# Supplementary material for: 3D microscaffolds with triple-marker sensitive nanoprobes for studying fatty liver disease in vitro
Source: Royal Society of Chemistry journal article supplement (doi:10.1039/d4nr00434e), 2024-01-01
Supplement: d4nr00434e1.pdf [file d4nr00434e1.pdf]

*Electronic Supplementary Material*

**3D microscaffolds with triple-marker sensitive nanoprobe for studying  
fatty liver disease *in vitro***

Simran Kaur Rainu<sup>a</sup> and Neetu Singh<sup>\* a,b</sup>

- a. Centre for Biomedical Engineering, Indian Institute of Technology Delhi, Hauz Khas,  
New Delhi 110016, India
- b. Biomedical Engineering Unit, All India Institute of Medical Sciences, Ansari Nagar,  
New Delhi 110029, India

\*Corresponding author: [sneetu@cbme.iitd.ac.in](mailto:sneetu@cbme.iitd.ac.in)

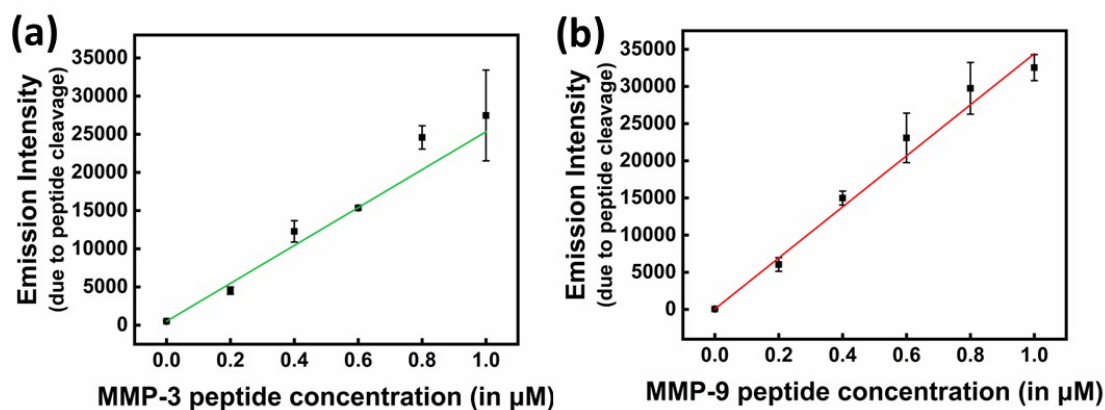

**Figure S1:** (a) Fluorescence intensity plot recorded at  $\lambda_{em} = 520 \text{ nm}$  for known concentrations of MMP-3 peptide substrate in 1 ng/mL MMP-3 enzyme containing media. (b) Fluorescence intensity plot recorded at  $\lambda_{em} = 576 \text{ nm}$  for known concentrations of MMP-9 peptide substrate in 1 ng/mL MMP-9 enzyme containing media.

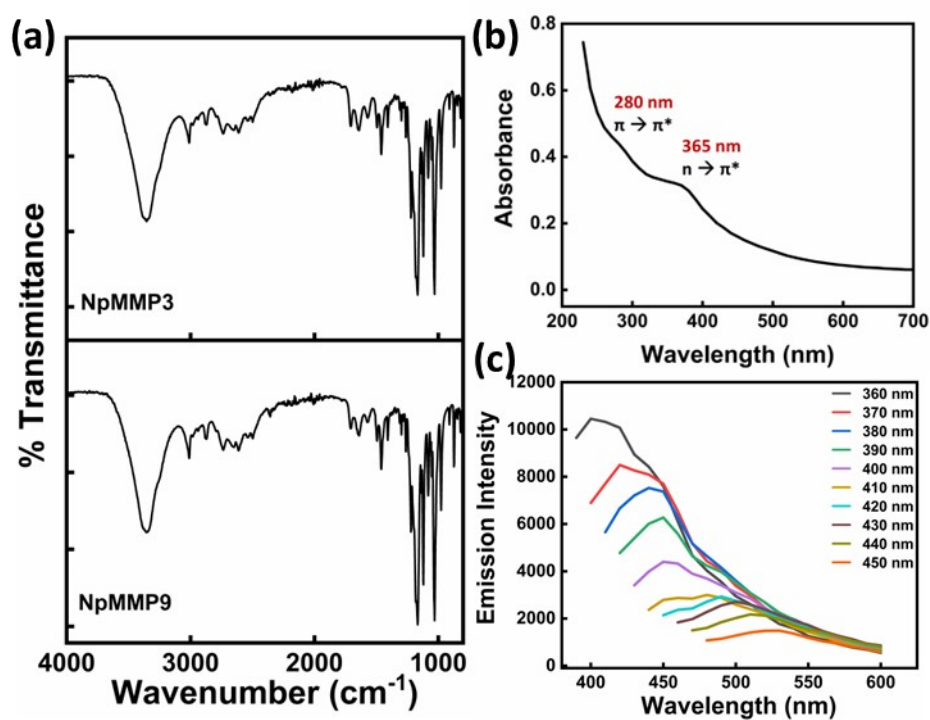

**Figure S2:** Characterisation of nanoprobe (a) FTIR spectra for NpMMP3 and NpMMP9; (b) Absorbance spectra for nanoprobe showing 2 peaks at 280 nm and 365 nm; (c) Plot showing excitation-dependent fluorescence emission behaviour of nanoprobe.

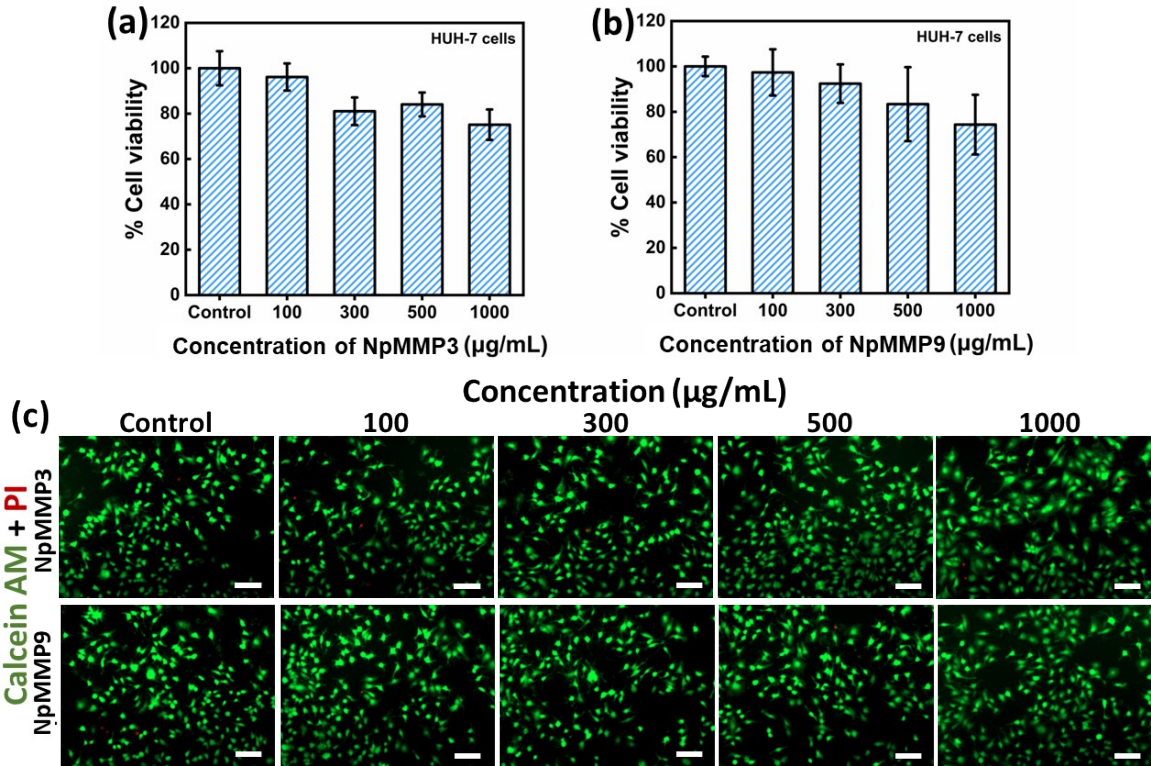

**Figure S3:** *In vitro* cytocompatibility for NpMMP3 and NpMMP9 nanoprobes in Huh-7 cell line using (a) MTT assay and (b) Live-dead assay by staining cells with Calcein-AM and PI dyes. (Scale bar: 100 µm)

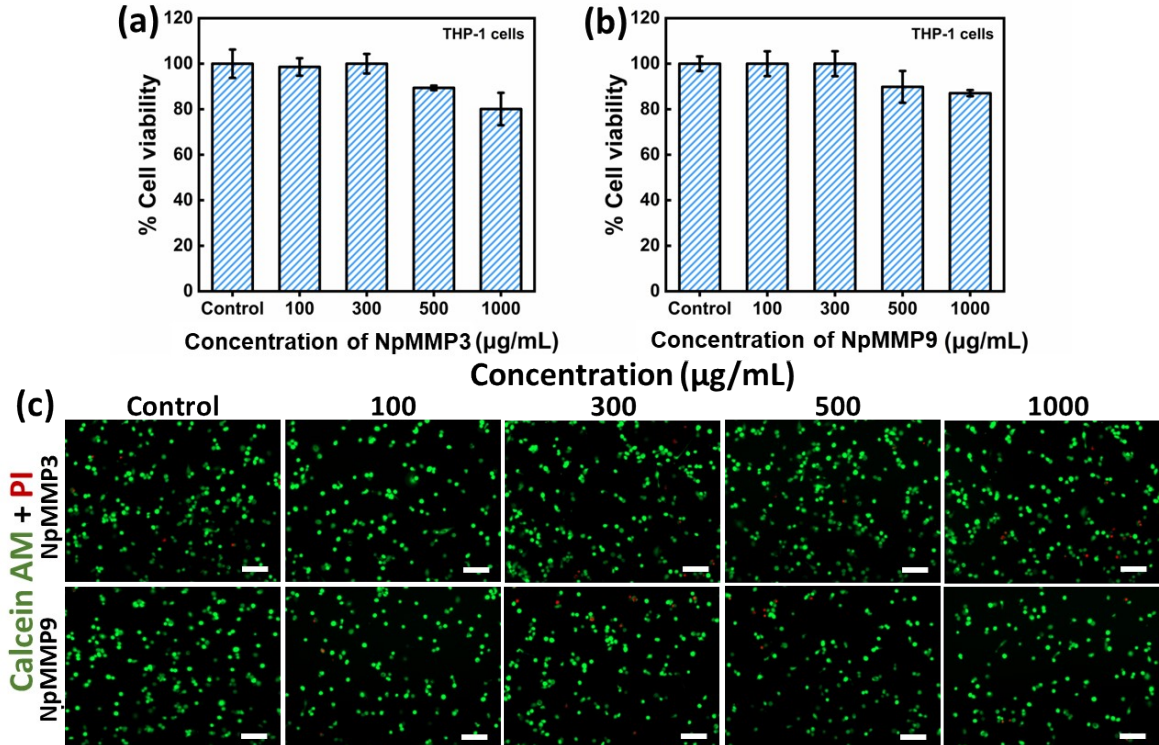

**Figure S4:** *In vitro* cytocompatibility for NpMMP3 and NpMMP9 nanoprobes in THP-1 cell line using (a) MTT assay and (b) Live-dead assay by staining cells with Calcein-AM and PI dyes. (Scale bar: 100 µm)

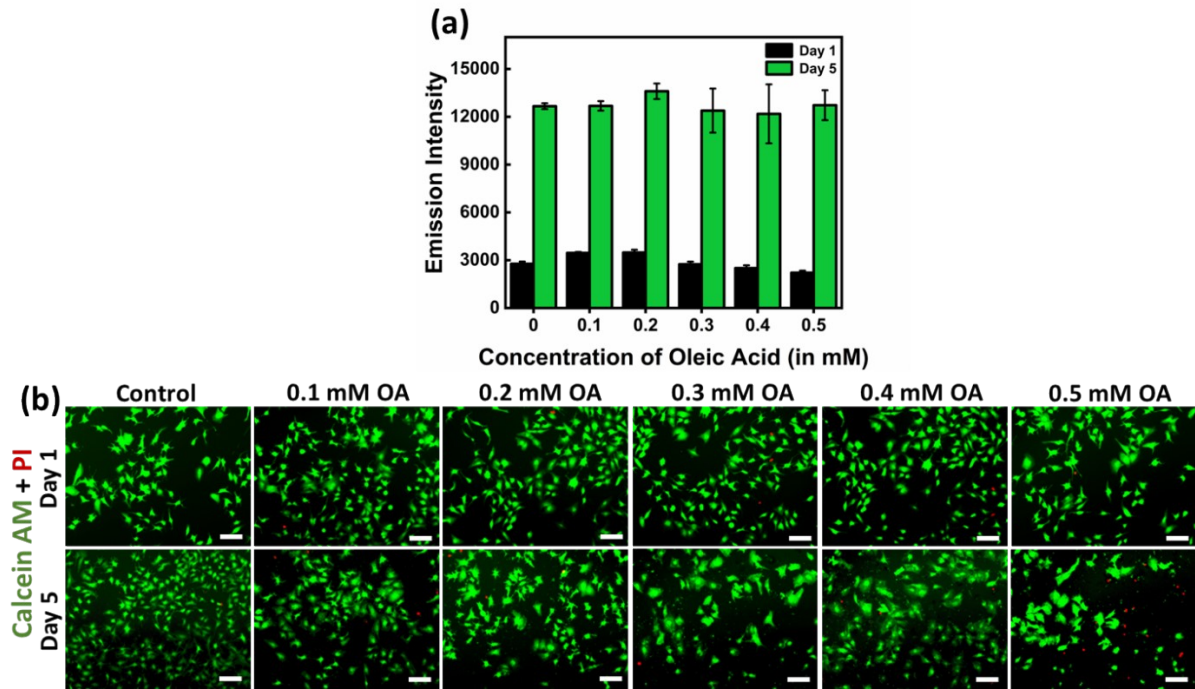

**Figure S5:** *In vitro* cytocompatibility of cells treated with varying concentrations of oleic acid using (a) Alamar blue assay and (b) Live-dead assay by staining cells with Calcein-AM and PI dyes. (Scale bar: 100  $\mu$ m)

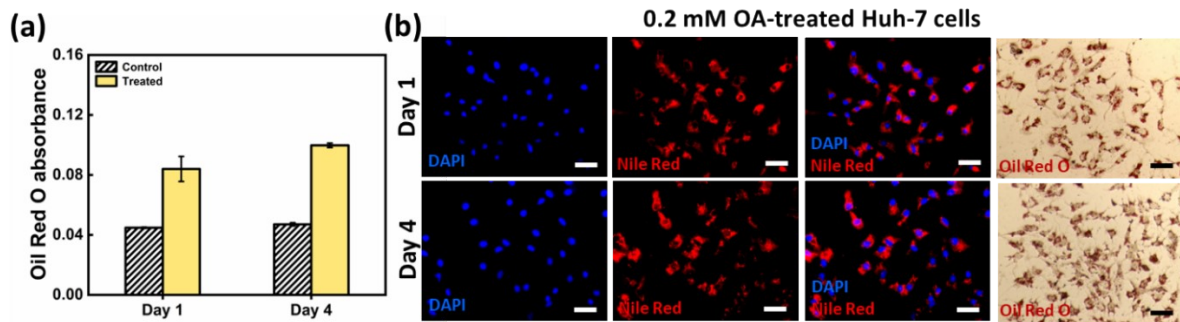

**Figure S6:** (a) Quantifying intracellular lipid accumulation in Oil Red O-stained 0.2 mM OA-treated Huh-7 cells; (b) visualising lipid accumulation in OA-treated cells by using Nile red/DAPI stains and Oil red O stains (Scale bar: 50  $\mu$ m)



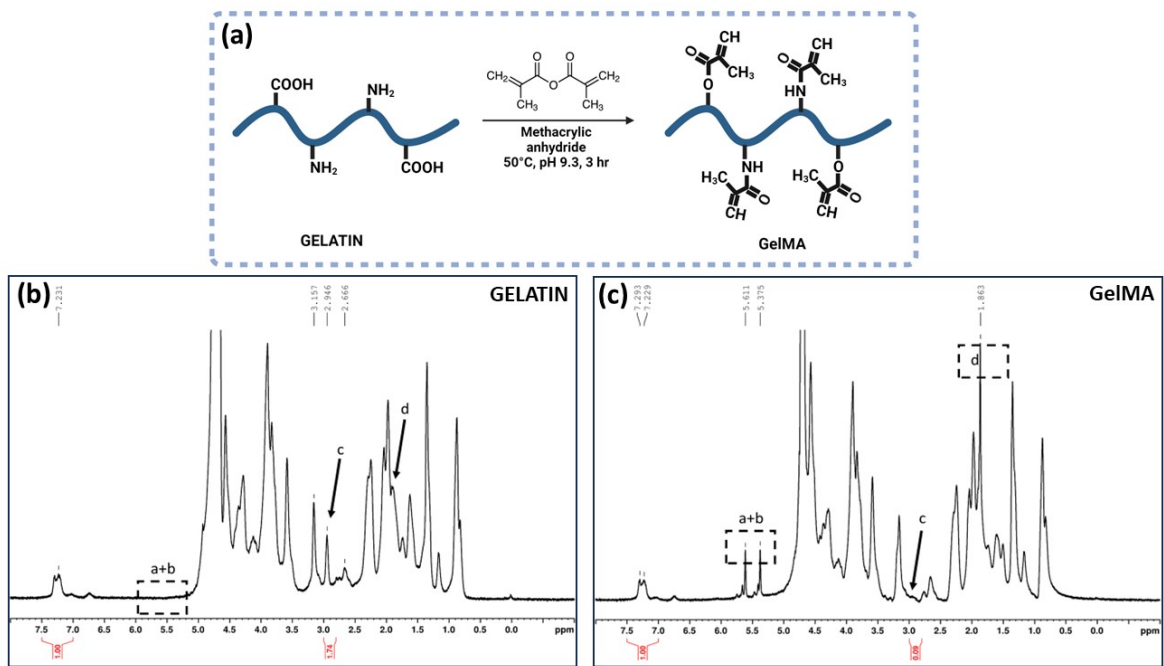

**Figure S7:** (a) Schematic showing synthesis protocol for GelMA using gelatin and methacrylic anhydride; <sup>1</sup>H NMR spectra for (b) gelatin and (c) GelMA.

| Pore diameter (nm) | Pore volume (cc/g) | Surface area (m <sup>2</sup> /g) |
|--------------------|--------------------|----------------------------------|
| 2.98               | 0.006              | 3.434                            |

**Figure S8:** Table showing pore diameter, pore volume and surface area of microscaffolds determined *via* BJH analysis of nitrogen adsorption desorption isotherms.

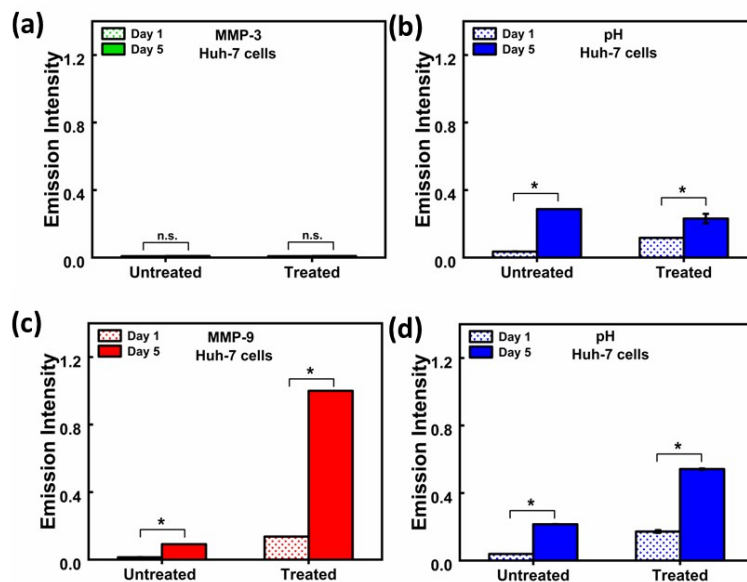

**Figure S9:** Normalised fluorescence emission intensity plots (corresponding to fluorescence microscopy images) showing change in expression of (a) MMP-3 & (b) pH; and (c) MMP-9 & (d) pH in 3D microscaffolds encapsulating untreated or treated Huh-7 cells at days 1 and 5. (\*p < 0.05)

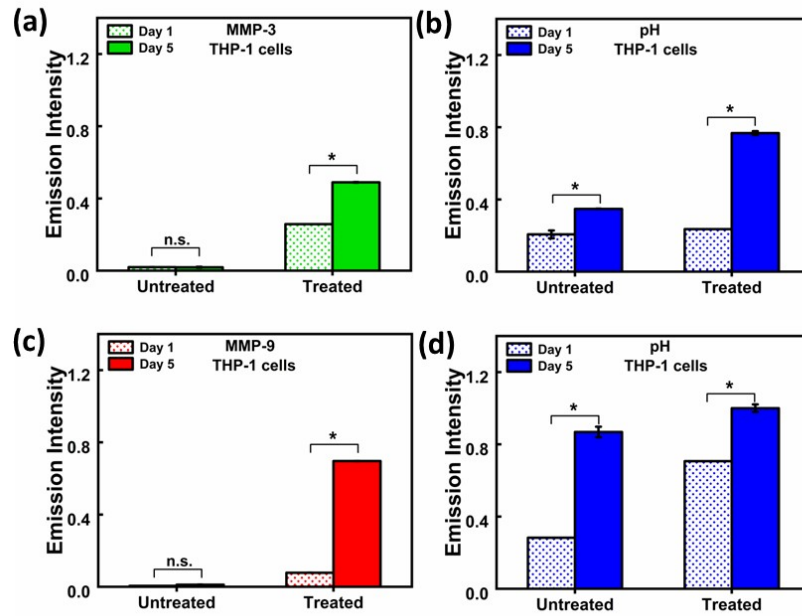

**Figure S10:** Normalised fluorescence emission intensity plots (corresponding to fluorescence microscopy images) showing change in expression of (a) MMP-3 & (b) pH; and (c) MMP-9 & (d) pH in 3D microscaffolds encapsulating untreated or treated THP-1 cells at days 1 and 5. (\*p < 0.05)

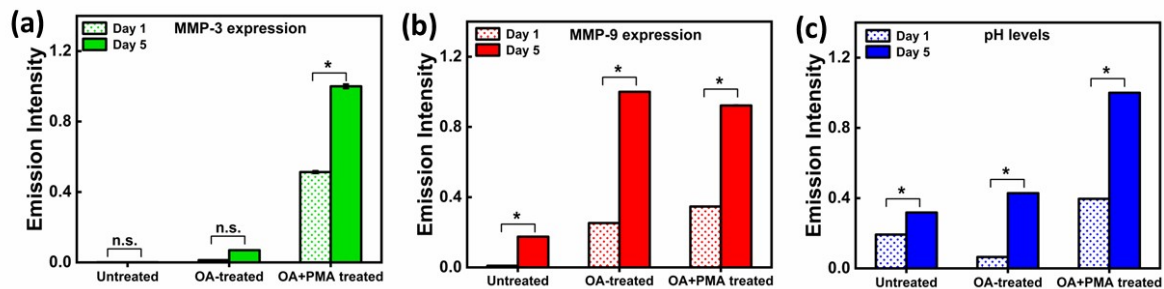

**Figure S11:** Normalised fluorescence emission intensity plots (corresponding to fluorescence microscopy images) showing change in expression of (a) MMP-3, (b) MMP-9 and (c) pH in 3D microscaffolds encapsulating Huh-7 and THP-1 cells at days 1 and 5. (\*p < 0.05)
